# Supplementary material for: Working memory in posterior cortical atrophy
Source: Springer Nature journal article supplement (doi:10.1007/s10072-019-03869-5), 2019-04-08
Supplement: MOESM1 [file 16629284]

***Supplementary materials***

***Patients and controls selection***

Five posterior cortical atrophy (PCA) patients, 11 typical Alzheimer’s disease (AD) patients, and 17 age-matched healthy subjects (HC, without history of neurological or psychiatric disease) participated in this study. Clinical diagnosis was based on a multi-disciplinary evaluation including clinical history and neurological examination, caregiver interview, and neuropsychological battery. Neurological assessment and diagnosis were performed by trained clinicians with expertise in the field of dementia. Medical records of patients clinically diagnosed with PCA were reviewed by a neurologist and a speech pathologist to ensure they met PCA diagnostic criteria. Diagnosis of PCA was made based on: 1) presentation with progressive visual or visuospatial impairment in the absence of ophthalmologic impairment; 2) evidence of complex visual disorder on examination: elements of Balint’s and Gerstmann’s syndrome, visual agnosia, alexia, apraxia, or environmental disorientation; 3) proportionately less memory loss. To meet criteria, patients were required to present with early complaints of visual and visuospatial impairment in the absence of major memory complaints [1, 2, see also 3]. The pattern of brain atrophy was centered on bilateral occipital, parietal and posterior temporal regions, with right-side predominance (see Migliaccio et al [4], in which the present five PCA patients were included).

The diagnosis of AD was made according to clinical criteria of the National Institute of Neurological and Communicative Disorders and Stroke and the Alzheimer’s disease and Related Disorders Association (NINCDS-ADRDA) [3].

The control group was composed by 17 subjects. All of them underwent physical and neurological examinations as well as cognitive screening.

Exclusion criteria for this study included history of other neurological or psychiatric diseases, ophthalmologic disease, extrapyramidal symptoms or signs, hallucinations, cognitive fluctuations, left-handedness, rapidly evolving dementia syndromes, or substantial MRI T2 white matter hyperintensities in the occipito-parietal regions.

***Global cognitive assessment***

The Mini Mental State Examination (MMSE) [5] was used as a global measure of cognitive status. All patients had a MMSE score > 12/30. PCA patients performed a detailed cognitive assessment previously described [4] exploring general memory, language and executive tests were also performed, such as the Free and Cued Selective Reminding Test or Rey Auditory Verbal Learning Test, word generation tasks for category and letter fluency. Furthermore, specific test to determine presence of visual agnosia, simultanagnosia, prosopagnosia, acalculia and ideomotor apraxia were also administered [4]. Three out of five PCA patients underwent also a neglect battery [6], a paper-and-pencil battery sensitive to signs of visual neglect. Patients demonstrated a mild-to-moderate global cognitive impairment on the tests assessing the global cognitive status (MMSE). Conversely, phonemic and categorical fluency were in the normal range. They also presented with spatial neglect, ideomotor apraxia, acaculia, simultanagnosia, optic ataxia and visual agnosia (for details see Migliaccio et al [4], in which the present five PCA patients were included).

***General results***

PCA patients and controls had similar age, whereas tAD patients were older than the other groups, as expected from their later disease onset. PCA patients and controls had similar education; controls were more educated than tAD patients. MMSE scores were statistically equivalent between the two groups of patients.

**Supplementary table 1**. Neuropsychological evaluation battery for working memory assessment.

| **VERBAL working memory assessment using letters** | **Items** | **Presentation modality** | **Restitution modality** | **Restitution order** |
| --- | --- | --- | --- | --- |
| LETTERS similar | verbal | verbal | forward |
| LETTERS similar | verbal | verbal | backward |
| LETTERS dissimilar | verbal | verbal | forward |
| LETTERS dissimilar | verbal | verbal | backward |
| LETTERS similar | visual | verbal | forward |
| LETTERS dissimilar | visual | verbal | forward |
| **VERBAL working memory assessment using numbers** | NUMBERS | verbal | verbal | forward |
| NUMBERS | verbal | verbal | backward |
| NUMBERS | verbal | by pointing | forward |
| NUMBERS | verbal | by pointing | backward |
| **VISUOSPATIAL working memory assessment** | NUMBERS | visual | verbal | forward |
| CUBES ordered | visual | by pointing | forward |
| CUBES ordered | visual | by pointing | backward |
| CUBES crossed | visual | by pointing | forward |
| CUBES crossed | visual | by pointing | backward |

Exemplificative table of neuropsychological evaluation battery to assess verbal and visuospatial working memory. It is composed by 15 tests with different stimuli (numbers, cubes or letters), presentation modalities (verbal or visual presentation) and response mode (verbal or manual pointing, forward or backward).

**Supplementary table** **2**. Kruskal-Wallis test and Bonferroni correction for each test.

| **Test** | Description | PCA  mean score | AD  mean score | HC  mean score | **runk sum statistic** | **pvalue** | **padj** |
| --- | --- | --- | --- | --- | --- | --- | --- |
| 1 | NUMBERS verbal presentation - verbal restitution - forward | 4.200 | 4.273 | 5.412 | 8.63 | 0.01 | 0.19 |
| 2 | NUMBERS verbal presentation - verbal restitution - backward | 0.800 | 2.364 | 3.647 | 19.58 | ≤0.01 | ≤0.01 |
| 3 | NUMBERS verbal presentation - restitution by pointing - forward | 2.800 | 3.273 | 5.882 | 20.45 | ≤0.01 | ≤0.01 |
| 4 | NUMBERS verbal presentation - restitution by pointing - backward | 0.400 | 2.727 | 4.412 | 23.02 | ≤0.01 | ≤0.01 |
| 5 | LETTERS similar - verbal presentation - forward | 3.400 | 3.636 | 5.353 | 19.53 | ≤0.01 | ≤0.01 |
| 6 | LETTERS similar - verbal presentation - backward | 1.200 | 1.818 | 3.941 | 23.91 | ≤0.01 | ≤0.01 |
| 7 | LETTERS dissimilar - verbal presentation - forward | 1.800 | 3.182 | 5.118 | 19.72 | ≤0.01 | ≤0.01 |
| 8 | LETTERS dissimilar - verbal presentation - backward | 2.000 | 3.182 | 5.118 | 22.32 | ≤0.01 | ≤0.01 |
| 9 | LETTERS similar - visual presentation - forward | 3.180 | 4.273 | 5.647 | 16.96 | ≤0.01 | ≤0.01 |
| 10 | LETTERS dissimilar - visual presentation - forward | 1.240 | 2.455 | 3.941 | 24.39 | ≤0.01 | ≤0.01 |
| 11 | NUMBERS visual presentation - verbal restitution | 0.400 | 1.727 | 3.588 | 21.94 | ≤0.01 | ≤0.01 |
| 12 | CUBES ordered - forward | 0.000 | 1.909 | 4.235 | 21.56 | ≤0.01 | ≤0.01 |
| 13 | CUBES ordered - backward | 0.000 | 0.273 | 3.471 | 25.83 | ≤0.01 | ≤0.01 |
| 14 | CUBES crossed - forward | 3.200 | 3.636 | 5.118 | 19.42 | ≤0.01 | ≤0.01 |
| 15 | CUBES crossed - backward | 1.400 | 2.182 | 3.706 | 21.92 | ≤0.01 | ≤0.01 |

Kruskal-Wallis one-way analysis of variance that takes into account the ordinal nature of the variable has been tested. Class mean, value of the Kruskal-Wallis rank sum statistic, p-value and adjusted p-value (Bonferroni correction) are reported for each variable.

Abbreviations: AD = Alzheimer’s disease; HC = healthy controls; PCA = posterior cortical atrophy.

**Supplementary references**

1. McMonagle P, Deering F, Berliner Y, Kertesz A (2006) The cognitive proﬁle of posterior cortical atrophy. Neurology 66:331-338.
2. Alladi S, Xuereb J, Bak T, Nestor P, Knibb J, Patterson K, Hodges J (2007) Focal cortical presentations of Alzheimer’s disease. Brain 130:2636-2645.
3. Montembeault M, Brambati SM, Lamari F, Michon A, Samri D, Epelbaum S, Lacomblez L, Lehéricy S, Habert MO, Dubois B, Kas A, Migliaccio R (2018) Atrophy, metabolism and cognition in the posterior cortical atrophy spectrum based on Alzheimer's disease cerebrospinal fluid biomarkers. Neuroimage Clin. 20:1018-1025. doi: 10.1016/j.nicl.2018.10.010.
4. McKhann G, Knopman D, Chertkow H, Hyman B, Jack C, Kawas C, Klunk W, Koroshetz W, Manly J, Mayeux R, Mohs R, Morris J, Rossor M, Scheltens P, Carrillo M, Thies B, Weintraub S, Phelps C (2011) The diagnosis of dementia due to Alzheimer's disease: recommendations from the National Institute on Aging-Alzheimer's Association workgroups on diagnostic guidelines for Alzheimer's disease. Alzheimers Dement 7:263-269.
5. Migliaccio R, Gallea C, Kas A, Perlbarg V, Samri D, Trotta L, Michon A, Lacomblez L, Dubois B, Lehericy S, Bartolomeo P (2016) Functional Connectivity of Ventral and Dorsal Visual Streams in Posterior Cortical Atrophy. JAD 4: 1119-30.
6. Folstein M, Folstein S, McHugh P (1975) Mini-mental State. A practical method for grading the cognitive state of patients for the clinician. J Psychiatr Res 12:189-198.
7. Azouvi P, Bartolomeo P, Beis J, Perennou D, Pradat-Diehl P, Rousseaux M (2006) A battery of tests for the quantitative assessment of unilateral neglect. Restor Neurol Neurosci 24:273-285.
